# Supplementary material for: PAM50 proliferation score as a predictor of weekly paclitaxel benefit in breast cancer
Source: Springer Nature journal article supplement (doi:10.1007/s10549-013-2416-2), 2013-02-19

# Table S1

| Variable                            | Paclitaxel 3w<br>(N=141) | Weekly Paclitaxel<br>(N=81) | Total<br>(N=222) |
|-------------------------------------|--------------------------|-----------------------------|------------------|
| Age                                 |                          |                             |                  |
| < 50                                | 43 (30.5)                | 25 (30.9)                   | 68               |
| ≥ 50                                | 98 (69.5)                | 56 (69.1)                   | 154              |
| Menopausal Status                   |                          |                             |                  |
| Pre                                 | 22 (15.8)                | 20 (24.7)                   | 42               |
| Post                                | 117 (84.2)               | 61 (75.3)                   | 178              |
| Performance Status                  |                          |                             |                  |
| 0                                   | 69 (49.6)                | 38 (47.5)                   | 107              |
| 1, 2 or 3                           | 70 (50.4)                | 42 (52.5)                   | 112              |
| Estrogen Receptor                   |                          |                             |                  |
| Negative                            | 65 (48.5)                | 32 (41.6)                   | 97               |
| Positive                            | 69 (51.5)                | 45 (58.4)                   | 114              |
| Progesterone Receptor               |                          |                             |                  |
| Negative                            | 70 (53.4)                | 38 (48.7)                   | 108              |
| Positive                            | 61 (56.6)                | 40 (51.3)                   | 101              |
| HER2 Status                         |                          |                             |                  |
| Negative                            | 35 (24.8)                | 40 (49.4)                   | 75               |
| Positive                            | 26 (18.4)                | 28 (34.6)                   | 54               |
| Unknown                             | 80 (56.7)                | 13 (16.0)                   | 93               |
| Trastuzumab Use                     |                          |                             |                  |
| No                                  | 95 (67.4)                | 29 (35.8)                   | 124              |
| Yes                                 | 46 (32.6)                | 52 (64.2)                   | 98               |
| PAM50 Subtype                       |                          |                             |                  |
| Basal                               | 35 (24.8)                | 20 (24.7)                   | 55               |
| HER2-enriched                       | 25 (17.7)                | 8 (9.9)                     | 33               |
| Luminal A                           | 46 (32.6)                | 29 (35.8)                   | 75               |
| Luminal B                           | 17 (12.1)                | 17 (21.0)                   | 34               |
| Normal-like                         | 18 (12.8)                | 7 (8.6)                     | 25               |
| Proliferation Score                 |                          |                             |                  |
| Mean (SD)                           | -0.14 (0.40)             | -0.13 (0.42)                | 222              |
|                                     |                          |                             |                  |
| Q1 – Low (< -0.42)                  | 36 (25.5)                | 21 (25.9)                   | 57               |
| Q1 – High (≥ -0.42)                 | 105 (74.5)               | 60 (74.1)                   | 165              |
|                                     |                          |                             |                  |
| Median – Low (< -0.14)              | 73 (51.8)                | 38 (46.9)                   | 111              |
| Median – High (≥ -0.14)             | 68 (48.2)                | 43 (53.1)                   | 111              |
|                                     |                          |                             |                  |
| Q3 – Low (< 0.17)                   | 106 (75.2)               | 61 (75.3)                   | 167              |
| Q3 – High (≥ 0.17)                  | 35 (24.8)                | 20 (24.7)                   | 55               |
|                                     |                          |                             |                  |
| First Quartile (< -0.42)            | 36 (25.5)                | 21 (25.9)                   | 57               |
| Second Quartile (-0.42 ≤ x < -0.14) | 37 (26.2)                | 17 (21.0)                   | 54               |
| Third Quartile (-0.14 ≤ x < 0.17)   | 33 (23.4)                | 23 (28.4)                   | 56               |
| Fourth Quartile (≥ 0.17)            | 35 (24.8)                | 20 (24.7)                   | 55               |

**Table S2**

| <b>Variables</b>                                                        | <b>p-value</b>                               | <b>HR</b>                    | <b>CI 95%</b>                                |
|-------------------------------------------------------------------------|----------------------------------------------|------------------------------|----------------------------------------------|
| <b>Treatment Arm</b> (FEC-P as reference)<br>FEC                        | <b>0.067</b>                                 | <b>1.323</b>                 | <b>0.981 – 1.784</b>                         |
| <b>Age</b> (<50 as reference)<br>>=50                                   | 0.551                                        | 0.839                        | 0.471 – 1.495                                |
| <b>Menopausal status</b> (pre as reference)<br>Postmenopausal           | 0.129                                        | 1.562                        | 0.878 – 2.778                                |
| <b>Primary tumor size</b> (T1 as reference)<br>T2<br>T3                 | <b>0.003</b><br><b>0.009</b><br><b>0.002</b> | <b>1.572</b><br><b>2.464</b> | <b>1.120 – 2.206</b><br><b>1.412 – 4.302</b> |
| <b>Nodal status</b> (1-3 as reference)<br>4+                            | <b>&lt;0.0001</b>                            | <b>1.816</b>                 | <b>1.347 – 2.449</b>                         |
| <b>ER</b> (positive as reference)<br>Negative                           | 0.634                                        | 1.105                        | 0.732 – 1.670                                |
| <b>PR</b> (positive as reference)<br>Negative                           | 0.183                                        | 1.302                        | 0.883 – 1.919                                |
| <b>Her2</b> (positive as reference)<br>Negative                         | 0.798                                        | 0.949                        | 0.636 – 1.417                                |
| <b>11-GeneProliferation</b> (low, first quartile, as reference)<br>High | <b>0.013</b>                                 | <b>1.765</b>                 | <b>1.130 – 2.758</b>                         |
| <b>Subtype PAM50</b> (luminal A as reference)<br>Rest                   | 0.138                                        | 1.361                        | 0.906 – 2.044                                |

# Fig. S1

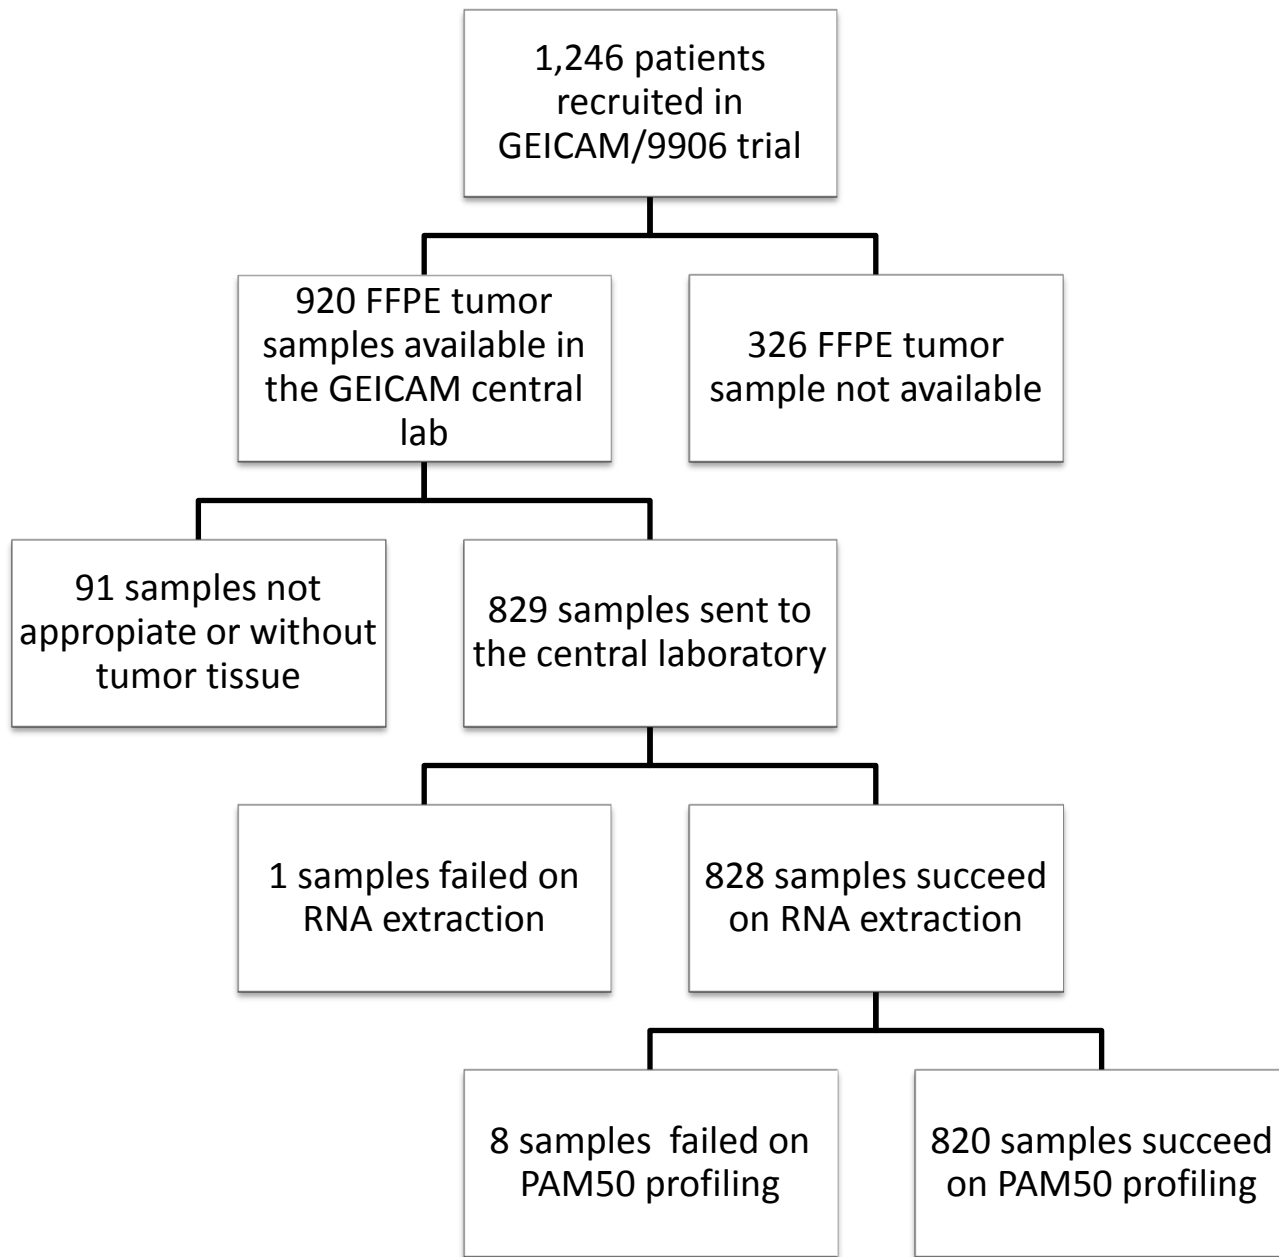

# Fig. S2

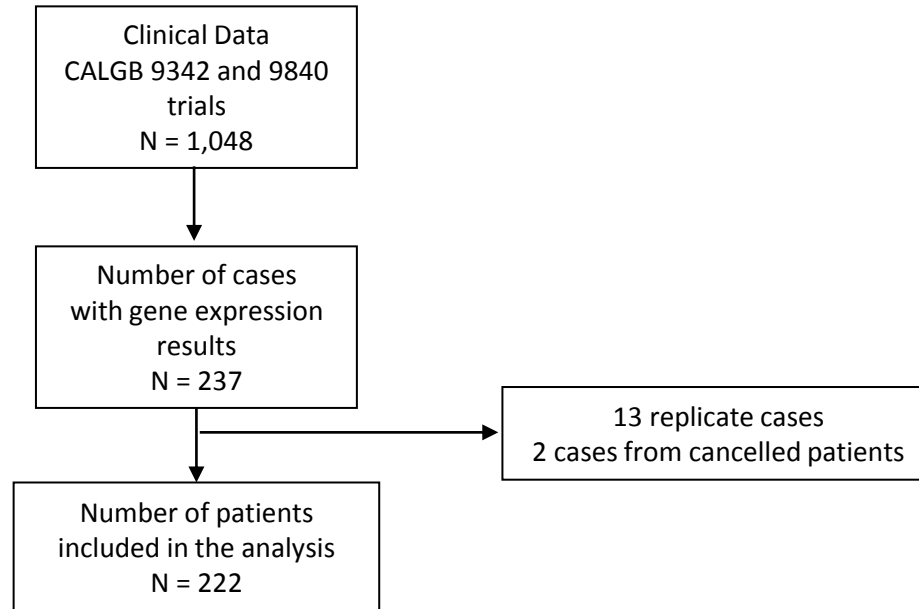

# Fig. S3

## A

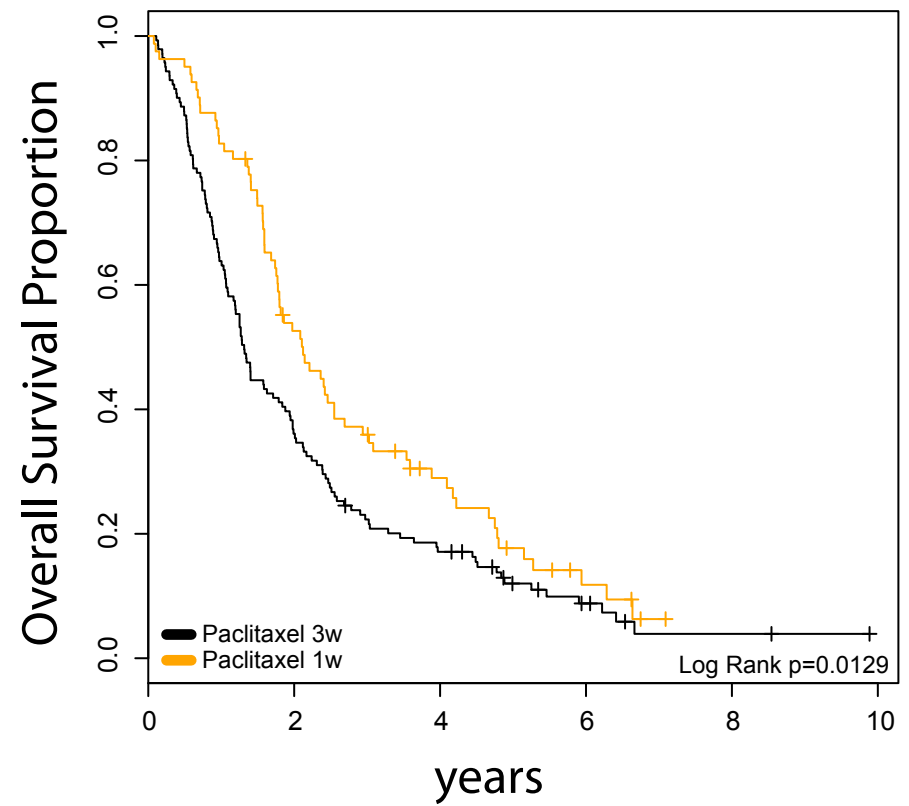

## B

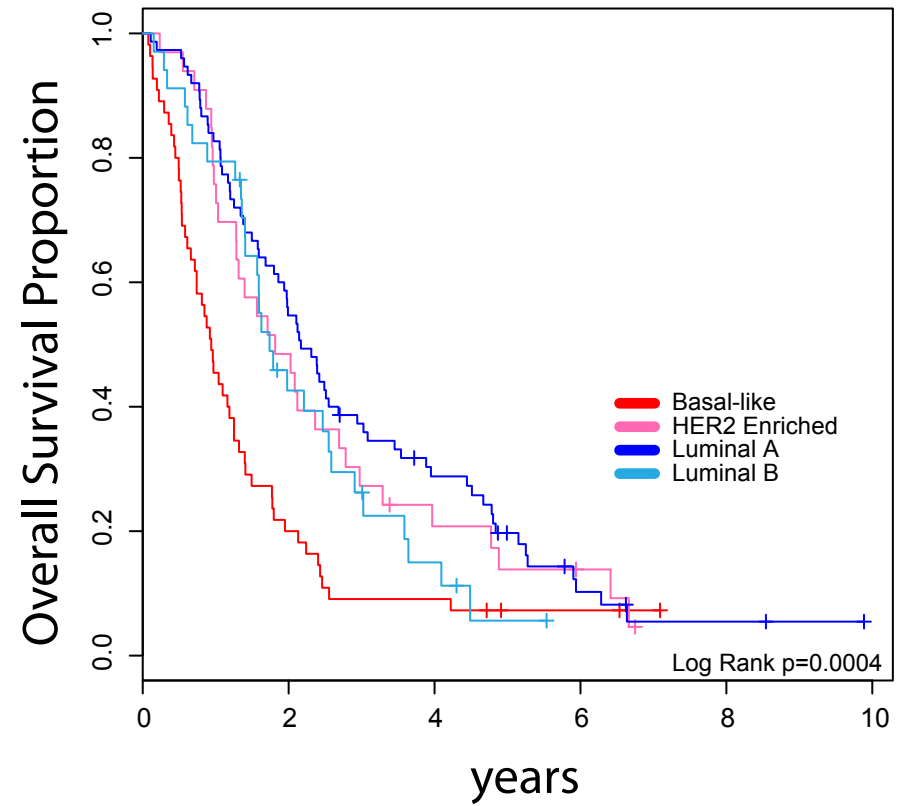

Supplement: MOESM1 [file 8845110]
